# Supplementary material
Source: HighWire-hosted journal article supplement (https://rmdopen.bmj.com/content/8/1/e002301)
Supplement: inline-supplementary-material-1 [file inline-supplementary-material-1.pdf]

Supplementary Table 1: Univariate logistic regression analysis

| Factor                                                              | SARS-CoV-2 IgG cut off 1 U/ml      |                                     | SARS-CoV-2 IgG cut off 7 U/ml      |                                     | SARS-CoV-2 IgG cut off 25 U/ml     |                                     |
|---------------------------------------------------------------------|------------------------------------|-------------------------------------|------------------------------------|-------------------------------------|------------------------------------|-------------------------------------|
|                                                                     | Post First Vaccination (OR 95% CI) | Post Second Vaccination (OR 95% CI) | Post First Vaccination (OR 95% CI) | Post Second Vaccination (OR 95% CI) | Post First Vaccination (OR 95% CI) | Post Second Vaccination (OR 95% CI) |
| Age*                                                                | 0.956 (0.931-0.979)                | 0.958(0.912-1.004)                  | 0.936 (0.910-0.964)                | 0.936 (0.909-0.963)                 | 0.956 (0.91-1.00)                  | 0.911 (0.884-0.938)                 |
| BMI                                                                 | 0.965 (0.920-1.013)                | 0.931 (0.851-1.018)                 | 0.966 (0.907-1.03)                 | 0.962 (0.914-1.01)                  | 0.875 (0.739-1.04)                 | 0.982 (0.938-1.03)                  |
| Lymphocyte count*                                                   | 3.40 (1.88-6.14)                   | 1.63 (0.647-4.10)                   | 2.25 (1.27-3.98)                   | 2.84 (1.51-5.34)                    | 3.56 (1.17-10.9)                   | 2.05 (1.25-3.36)                    |
| <b>Gender</b>                                                       |                                    |                                     |                                    |                                     |                                    |                                     |
| Female                                                              | Ref                                | Ref                                 | Ref                                | Ref                                 | Ref                                | Ref                                 |
| Male                                                                | 1.03 (0.556-1.92)                  | 1.45 (0.381-5.56)                   | 0.673 (0.322-1.41)                 | 0.768 (0.396-1.49)                  | 1.02 (0.248-4.22)                  | 0.991 (0.552-1.78)                  |
| <b>eGFR</b>                                                         |                                    |                                     |                                    |                                     |                                    |                                     |
| Normal (eGFR≥90)                                                    | Ref                                | Ref                                 | Ref                                | Ref                                 | Ref                                | Ref                                 |
| Mild impairment (60≤eGFR<89)                                        | 0.61 (0.30-1.21)                   | 1.26 (0.20-7.76)                    | 0.356 (0.161-0.972)                | 0.501 (0.222-1.129)                 | N/A                                | 0.630 (0.321-1.239)                 |
| Moderate impairment* (30≤eGFR<59)                                   | 0.29 (0.06-1.30)                   | 0.06 (0.011-0.34)                   | N/A                                | 0.105 (0.023-0.474)                 | N/A                                | 0.158 (0.031-0.795)                 |
| <b>Smoking status</b>                                               |                                    |                                     |                                    |                                     |                                    |                                     |
| Non-Smoker                                                          | Ref                                | Ref                                 | Ref                                | Ref                                 | Ref                                | Ref                                 |
| Current smoker                                                      | 0.614 (0.22-1.71)                  | N/A                                 | 0.649 (0.177-2.38)                 | 1.61 (0.439-5.917)                  | 1 (0.119-8.411)                    | 1.61 (0.439-5.92)                   |
| Ex-smoker                                                           | 0.516 (0.24-1.11)                  | 0.687 (0.18-2.68)                   | 0.699 (0.267-1.83)                 | 0.898 (0.397-2.03)                  | N/A                                | 0.735 (0.355-1.52)                  |
| Type 2 Diabetes Mellitus                                            | 0.638 (0.16-2.57)                  | 0.244 (0.034-1.73)                  | N/A                                | 0.163 (0.03-0.882)                  | N/A                                | 0.277 (0.032-2.43)                  |
| <b>Vaccine Type *</b>                                               |                                    |                                     |                                    |                                     |                                    |                                     |
| Astra Zeneca                                                        | Ref                                | Ref                                 | Ref                                | Ref                                 | Ref                                | Ref                                 |
| Pfizer                                                              | 3.72 (2.023-6.832)                 | 7.012 (1.497-32.85)                 | 4.811 (2.109-10.978)               | 12.96-(29.71)                       | 1.787 (0.449-7.11)                 | 16.24 (8.18- 32.25)                 |
| <b>IMID</b>                                                         |                                    |                                     |                                    |                                     |                                    |                                     |
| Healthy Control                                                     | Ref                                | Ref                                 | Ref                                | Ref                                 | Ref                                | Ref                                 |
| Rheumatoid arthritis                                                | 0.115 (0.044-0.230)                | 0.620 (0.120-3.21)                  | 0.178(0.067-0.471)<br>p=0.001      | 0.525 (0.221-1.249)                 | N/A                                | 0.532 (0.261-1.085)                 |
| Ankylosing Spon                                                     | 0.933 (0.169-5.155)                | 0.791 (0.067-9.304)                 | 1.64 (0.510-5.321)                 | 1.8 (0.350-9.262)                   | N/A                                | 3.218 (0.817-12.677)                |
| Psoriatic arthritis                                                 | 0.314 (0.109-0.904)                | N/A                                 | 0.645 (0.267-1.557)                | 0.498 (0.191-1.300)                 | 0.698 (0.184-2.644)                | 0.944 (0.415-2.145)                 |
| Time between 1 <sup>st</sup> and 2 <sup>nd</sup> vaccination dose * | N/A                                | 0.962 (0.937-0.987)                 | N/A                                | 0.960 (0.947-0.973)                 | N/A                                | 0.952 (0.941-0.964)                 |
| <b>Intervention group*</b>                                          |                                    |                                     |                                    |                                     |                                    |                                     |
| Continue                                                            | Ref                                | Ref                                 | Ref                                | Ref                                 | Ref                                | Ref                                 |
| Withhold                                                            | 2.84 (1.46-5.54)                   | 4.02 (0.85-19.0)                    | 1.47 (0.65-3.32)                   | 2.03 (0.961-4.31)                   | 1.07 (0.146 – 7.78)                | 2.55 (1.33-4.90)                    |
| <b>Immunosuppression*</b>                                           |                                    |                                     |                                    |                                     |                                    |                                     |
| csDMARD                                                             | Ref                                | Ref                                 | Ref                                | Ref                                 | Ref                                | Ref                                 |
| bDMARD                                                              | 2.90 (1.202-6.975)                 | 0.377 (0.0699-2.033)                | 2.776 (1.031-7.471)                | 0.788 (0.310-2.003)                 | 0.865 (0.117-6.3395)               | 1.166 (0.541-2.513)                 |
| tsDMARD                                                             | 0.509 (0.230-1.123)                | 0.362 (0.067-1.953)                 | 0.595 (0.175-2.020)                | 0.375 (0.153-0.917)                 | N/A                                | 0.455 (0.207-0.997)                 |

Supplementary Table 2: Multivariate logistic regression analysis

| Factor                                                            | SARS-CoV-2 IgG cut off 1 U/ml      |                                     | SARS-CoV-2 IgG cut off 7 U/ml      |                                     | SARS-CoV-2 IgG cut off 25 U/ml     |                                     |
|-------------------------------------------------------------------|------------------------------------|-------------------------------------|------------------------------------|-------------------------------------|------------------------------------|-------------------------------------|
|                                                                   | Post First Vaccination (OR 95% CI) | Post Second Vaccination (OR 95% CI) | Post First Vaccination (OR 95% CI) | Post Second Vaccination (OR 95% CI) | Post First Vaccination (OR 95% CI) | Post Second Vaccination (OR 95% CI) |
| Age                                                               | 0.986 (0.940-1.034)                | 1.061 (0.963-1.169)                 | 0.941 (0.891-0.994)                | 1.028 (0.969-1.089)                 | 0.859 (0.723-1.020)                | 0.958 (0.914-1.006)                 |
| Lymphocyte count                                                  | 2.694 (1.328-5.466)                | 0.779 (0.241-2.520)                 | 1.812 (0.871-3.770)                | 2.303 (1.025-5.178)                 | 12.865 (0.339-488.1)               | 1.548 (0.786-3.045)                 |
| <b>eGFR</b>                                                       |                                    |                                     |                                    |                                     |                                    |                                     |
| Normal                                                            | Ref                                | Ref                                 | Ref                                | Ref                                 | Ref                                | Ref                                 |
| Mild impairment                                                   | 0.765 (0.304-1.928)                | 1.375 (0.158-11.922)                | 0.859 (0.286-2.583)                | 0.587 (0.199-1.735)                 | N/A                                | 1.252 (0.482-3.251)                 |
| Moderate impairment                                               | 0.841 (0.134-5.294)                | 0.066 (0.004-0.943)                 | N/A                                | 0.172 (0.021-1.395)                 | N/A                                | 1.843 (0.254-13.381)                |
| <b>Vaccine</b>                                                    |                                    |                                     |                                    |                                     |                                    |                                     |
| Astra Zeneca                                                      | Ref                                | Ref                                 | Ref                                | Ref                                 | Ref                                | Ref                                 |
| Pfizer                                                            | 2.549 (0.826-7.865)                | 8.430 (0.062-114.2)                 | 2.176 (0.426-11.108)               | 2.771 (0.319-24.054)                | N/A                                | 1.416 (0.205-9.779)                 |
| Time between 1 <sup>st</sup> and 2 <sup>nd</sup> vaccination dose | N/A                                | 0.980 (0.912-1.054)                 | N/A                                | 0.971 (0.940-1.004)                 | N/A                                | 0.974 (0.944-1.004)                 |
| <b>Intervention group*</b>                                        |                                    |                                     |                                    |                                     |                                    |                                     |
| Continue                                                          | Ref                                | Ref                                 | Ref                                | Ref                                 | Ref                                | Ref                                 |
| Withhold                                                          | 4.711 (1.965-11.294)               | 1.946 (0.274-13.815)                | 3.541 (1.214-10.329)               | 1.357 (0.496-3.713)                 | 3.015 (0.165-55.231)               | 3.590 (1.441-8.943)                 |
| <b>Immunosuppression</b>                                          |                                    |                                     |                                    |                                     |                                    |                                     |
| csDMARD                                                           | Ref                                | Ref                                 | Ref                                | Ref                                 | Ref                                | Ref                                 |
| bdMARD                                                            | 2.668 (0.890-7.998)                | 0.480 (0.048-4.785)                 | 2.791 (0.850-9.168)                | 0.507 (0.136-1.887)                 | 0.102 (0.001-9.484)                | 0.970 (0.333-2.826)                 |
| tsDMARD                                                           | 0.397 (0.152-1.038)                | 0.292 (0.036-2.368)                 | 0.731 (0.186-2.877)                | 0.229 (0.070-0.743)                 | N/A                                | 0.409 (0.146-1.144)                 |
